# Supplementary material for: High-Resolution Microscopy to Learn the Nuclear Organization of the Living Yeast Cells
Source: Hindawi journal article supplement (doi:10.1155/2021/9951114), 2021-08-27
Supplement: f1 [file 9951114.f1.docx]

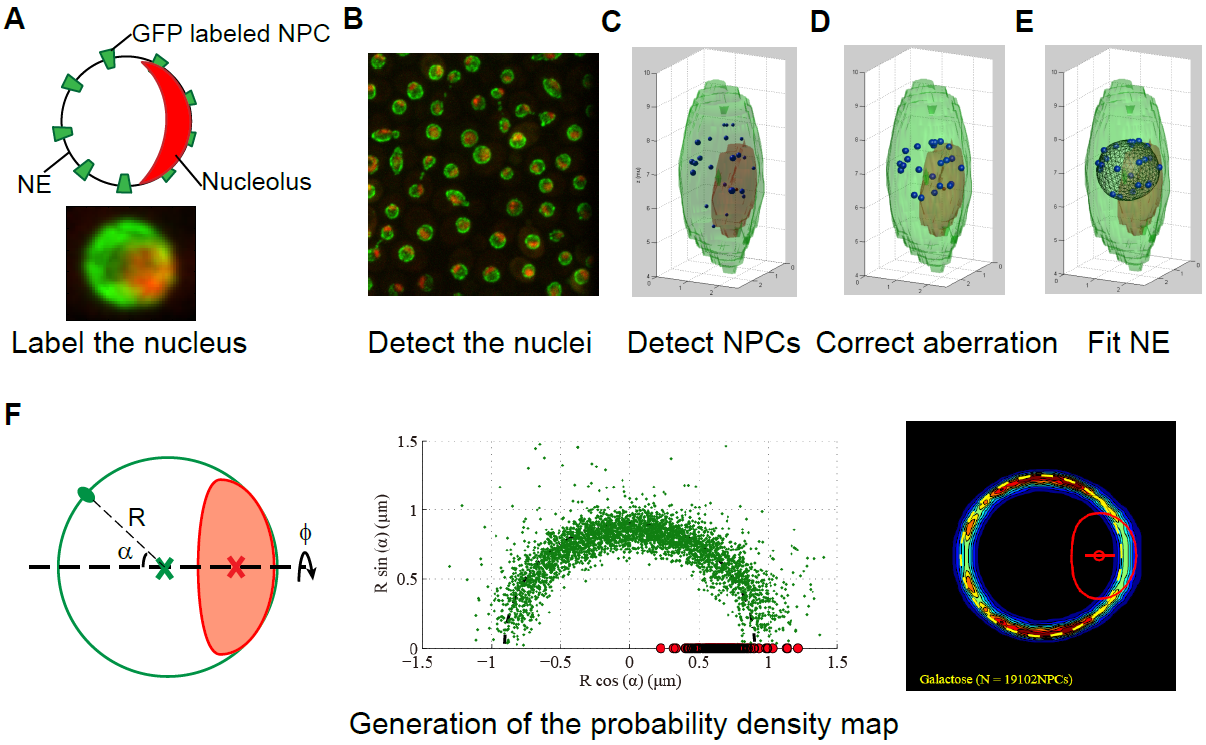


**Figure S1. Schematical illustration of the NucQuant.**

In the cell population, the NPC was labeled with GFP and the nucleolus was labeled with mCherry (**A**) firstly, then the fluorescent nuclear images were acquired through the confocal microscopy (**B**). Second, each nucleus was cropped by NucQuant one by one (**C**), the aberration along the Z-axis was corrected (**D**), and the NE was fitted through the 3D-NE method in the NucQuant (**E**). The sphericity will be calculated at the same time. For one single nucleus, NucQuant will adopt the nucleus center (**green X**) and the nucleolus center (**red X**) as two landmarks, the line through the nuclear center and nucleolus center as the central axis (dashed black line), α is the angle of the labeled NPC relevant to the nuclear center and the central axis. All nuclei were aligned into one single system by using the same coordinate system (the nuclear center, nucleolus center, the central axis and the angle α), then all the NPC were cylindrical projected into the 2D system, and the NPC probability density map was calculated based on the cylindrical projection. The color in the NPC map represents the different probability, the color closer to red signifies the more NPC around here.
